# Supplementary material
Source: PubMed Central journal article supplement (PMC9054068)
Supplement: mmc1.pdf [file mmc1.pdf]

# THE LANCET

## Rheumatology

### Supplementary appendix

This appendix formed part of the original submission and has been peer reviewed. We post it as supplied by the authors.

Supplement to: Boekel L, Stalman EW, Wieske L, et al. Breakthrough SARS-CoV-2 infections with the delta (B.1.617.2) variant in vaccinated patients with immune-mediated inflammatory diseases using immunosuppressants: a substudy of two prospective cohort studies. *Lancet Rheumatol* 2022; published online April 29. [https://doi.org/10.1016/S2665-9913\(22\)00102-3](https://doi.org/10.1016/S2665-9913(22)00102-3).

## Supplementary appendix:

### “COVID-19 breakthrough infections in patients with immune-mediated inflammatory disorders and immunosuppressants – data from two prospective cohort studies”

Boekel L, Stalman EW, et al.

#### Contents

|                                                                                                                                                       |    |
|-------------------------------------------------------------------------------------------------------------------------------------------------------|----|
| • List of study collaborators                                                                                                                         | 2  |
| • Supplementary methods                                                                                                                               | 3  |
| ○ T2B! study                                                                                                                                          |    |
| ○ ARC study                                                                                                                                           |    |
| • Data sharing statement                                                                                                                              | 3  |
| • Table S1. Missing data                                                                                                                              | 4  |
| • Table S2. Baseline characteristics for the two cohorts separately                                                                                   | 5  |
| • Table S3. Baseline characteristics of all participants with and without breakthrough infections of both cohorts combined                            | 7  |
| • Table S4. Sensitivity analyses                                                                                                                      | 9  |
| • Table S5. Characteristics of SARS-CoV-2 breakthrough cases treated with anti-CD20 therapy                                                           | 11 |
| • Table S6 Subgroup analyses                                                                                                                          | 12 |
| • Table S7. Disease severity of SARS-CoV-2 breakthrough infections                                                                                    | 13 |
| • Table S8. Characteristics of hospitalized participants                                                                                              | 14 |
| • Table S9 Characteristics of participants who developed COVID-19 after receiving an additional vaccine dose                                          | 15 |
| • Figure S1. Cumulative incidence curve                                                                                                               | 16 |
| • Figure S2. Flowchart of the two cohorts separately                                                                                                  | 17 |
| • Figure S3. Relationship between antibody titers after vaccination and the incidence of SARS-CoV-2 breakthrough infections.                          | 18 |
| • Figure S4 Disease severity of immune-mediated inflammatory disease (IMID) patients with immunosuppressants and controls for both cohorts separately | 19 |

### **List of study collaborators**

Rivka de Jongh - Sanquin, Amsterdam, The Netherlands  
Carolien van de Sandt - Sanquin, Amsterdam, The Netherlands  
Lisan Kuijper - Sanquin, Amsterdam, The Netherlands  
Mariel Duurland - Sanquin, Amsterdam, The Netherlands  
Ruth Hagen - Sanquin, Amsterdam, The Netherlands  
Jet van den Dijssel - Sanquin, Amsterdam, The Netherlands  
Christine Kreher - Sanquin, Amsterdam, The Netherlands  
Amelie Bos - Sanquin, Amsterdam, The Netherlands  
Viriginia Palomares Cabeza - Sanquin, Amsterdam, The Netherlands  
Sergey Nejentsev - Amsterdam UMC, Amsterdam, The Netherlands  
Elham Mirfazeli - Amsterdam UMC, Amsterdam, The Netherlands

## Supplementary methods

### T2B! study

#### *Recruiting centers*

Participants treated in out-patient clinics at the Amsterdam UMC (locations AMC and VUmc), Erasmus MC Rotterdam, Leiden University Medical Centre, University Medical Centre Groningen, Maastricht University Medical Centre), Utrecht University Medical Centre, and one Rheumatology treatment center (Reade, Amsterdam Rheumatology & immunology Centre, Amsterdam). Additional participants were recruited from two cohort studies on COVID-19 related disease severity in patients with auto-immune diseases, the ARC, and COMS-19 studies (Trial ID NL8513 and NCT04498286).

#### *Pre-defined immune mediated inflammatory disorders*

Rheumatological: rheumatoid arthritis, spondyloarthritis, SLE, giant cell arteritis, Sjogren syndrome, vasculitis, other immune-mediated rheumatologic conditions.

Neurological: multiple sclerosis, neuromyelitis optica spectrum disorder, myasthenia gravis, chronic inflammatory demyelinating polyneuropathy, multifocal motor neuropathy, inflammatory myositis

Gastro-enterological: Crohn's disease, ulcerative colitis, auto-immune hepatitis, other inflammatory bowel disorders

Dermatological: atopic dermatitis, psoriasis, pemphigus, other immune-mediated dermatologic conditions

#### *Definitions of active treatment, types of immunosuppressants and combination therapies*

We defined immunosuppressants (ISPs) as either immunosuppressive or immunomodulatory treatment. Active treatment was defined as treatment with a particular ISP in the last three moments prior to the first vaccination or if treatment was started between the first and second vaccination (when applicable). For antiCD20 therapies, cladribine, or cyclophosphamide active treatment was defined as a last administration within 12 months prior to first vaccination or between the first and second vaccination. Subdivision was made between monotherapy or as part of combination therapy. The following treatments were not regarded as systemic immunosuppressants in this study: any topical, inhaled, or rectal administered immunosuppressant, mesalazine, sulfasalazine, and budesonide.

#### *Eligible participants*

Patients were eligible if diagnosed with any of the pre-defined immune mediated inflammatory disorders, and control participants were eligible if no active or previous autoimmune, oncological or hematological disease and no current or previous treatment with systemic immunosuppressive medication in the last year. All participants were > 18 years old and able to complete a questionnaire in Dutch. Participants with immunosuppressant therapy for cancer (i.e. chemotherapy) or organ transplantation (incl. stem-cell transplantation) and participants with known pregnancy were excluded.

Further details on methodology of the T2B! study have been described before (*study accepted for publication in the Lancet Rheumatology, reference not yet available*)

### ARC study

#### *Study design*

Between April, 2020 and March, 2021, all adult patients with rheumatic IMIDs from the Amsterdam Rheumatology & immunology Center were invited to participate in this study. All patients were asked, but not obliged, to recruit their own control subject of the same sex, comparable age (age difference of < 5 years) and without a rheumatic IMID. Clinical data prior to SARS-CoV-2 vaccination were collected at baseline and up to two times during follow-up via online questionnaires distributed by email. Prior to SARS-CoV-2 vaccination, serum samples were collected up to two times via regular blood withdrawal at the local research institutes or via a finger prick that could be performed at home, prior to COVID-19 vaccination. After SARS-CoV-2 vaccination, serum samples were collected up to three times. All participants gave written informed consent.

#### *Procedures*

Data collection on the incidence and disease severity of COVID-19 ended on April 30, 2021, due to the start of the Dutch national COVID-19 vaccination program. The baseline questionnaire was sent to participants when they were included in the study. The first and second follow-up questionnaires were sent to participants 1-4 and 5-9 months after completion of the baseline questionnaire

Between May and November 2020, all included patients were invited for their first blood draw at the local research institute of Reade, preferably at the time of completion of the first follow-up survey. Between October and December 2020, a self-administered finger prick test kit was sent to healthy controls and patients who were unable to visit the research institute. Between January and March 2021, all participants were invited for a first or second blood draw at the research institute, again preferably at the time of completing a follow-up survey. A test kit was sent to participants who had indicated their preference for the finger prick method in a previous survey or via direct contact with the researchers. From April 1, 2021, serum samples were collected after the first and/or second SARS-CoV-2 vaccine dose. Between October 1 and December 31, 2021, serum samples were collected cross-sectionally to investigate the serum prevalence of nucleocapsid antibodies.

#### **Data sharing**

Aggregated data and code for reproducing the results of this analysis can be shared upon reasonable request.

**Table S1 Missing data**

Table showing the number of missings in variables with missing data. Variables not included in the table had no missings. The number of missings in comorbidity data in healthy controls is relatively high due to inability to access healthcare records to verify diagnoses of healthy controls included in the T2B! study.

|                                     | IMID patients with immunosuppressants<br>(n = 3207) |                                            | IMID patients without immunosuppressants<br>(n = 985) |                                           | Healthy controls<br>(n = 822)         |                                           |
|-------------------------------------|-----------------------------------------------------|--------------------------------------------|-------------------------------------------------------|-------------------------------------------|---------------------------------------|-------------------------------------------|
|                                     | With breakthrough infection<br>(n= 148)             | Without breakthrough infection<br>(n=3059) | With breakthrough infection<br>(n=52)                 | Without breakthrough infection<br>(n=933) | With breakthrough infection<br>(n=33) | Without breakthrough infection<br>(n=789) |
| <b>Comorbidities – no. (%)</b>      |                                                     |                                            |                                                       |                                           |                                       |                                           |
| Cardiovascular disease              | 0 (0)                                               | 0 (0)                                      | 0 (0)                                                 | 0 (0)                                     | 0 (0)                                 | 82 (10)                                   |
| Chronic pulmonary disease           | 0 (0)                                               | 0 (0)                                      | 0 (0)                                                 | 0 (0)                                     | 5 (15)                                | 82 (10)                                   |
| Diabetes                            | 0 (0)                                               | 0 (0)                                      | 0 (0)                                                 | 0 (0)                                     | 0 (0)                                 | 82 (10)                                   |
| Obesity                             | 0 (0)                                               | 5 (0.2)                                    | 0 (0)                                                 | 5 (0.5)                                   | 0 (0)                                 | 10 (1)                                    |
| <b>T2B-study serology – no. (%)</b> | n = 84                                              | n = 1572                                   | n = 22                                                | n = 452                                   | n = 7                                 | n = 167                                   |
| Sample available – no. (%)          | 9 (11)                                              | 187 (12)                                   | 3 (14)                                                | 54 (12)                                   | 0 (0)                                 | 16 (10)                                   |

*IMID = immune mediated inflammatory disease.*

**Table S2. Baseline characteristics for the two cohorts separately**

Table showing baseline characteristics of immune-mediated inflammatory disorder (IMID) patients with immunosuppressants and controls (IMID patients without immunosuppressants and healthy controls) for the two cohort studies.

|                                                                  | ARC-cohort<br>(n = 2444)       |                                  |                                  | T2B-cohort<br>(n = 2573)       |                                  |                                  |
|------------------------------------------------------------------|--------------------------------|----------------------------------|----------------------------------|--------------------------------|----------------------------------|----------------------------------|
|                                                                  | IMID<br>with IST<br>(n = 1355) | IMID<br>without IST<br>(n = 454) | Healthy<br>controls<br>(n = 632) | IMID<br>with IST<br>(n = 1852) | IMID<br>without IST<br>(n = 531) | Healthy<br>controls<br>(n = 190) |
| <b>Patient characteristics</b>                                   |                                |                                  |                                  |                                |                                  |                                  |
| Age, years – mean (SD)                                           | 59 (13)                        | 58 (14)                          | 60 (12)                          | 50 (13)                        | 51 (13)                          | 48 (11)                          |
| Female sex – no. (%)                                             | 908 (67)                       | 258 (57)                         | 423 (67)                         | 1134 (61)                      | 340 (64)                         | 126 (66)                         |
| Male sex – no. (%)                                               | 447 (33)                       | 196 (43)                         | 209 (33)                         | 718 (39)                       | 191 (36)                         | 63 (34)                          |
| <b>Comorbidities – no. (%)</b>                                   |                                |                                  |                                  |                                |                                  |                                  |
| Cardiovascular disease                                           | 180 (13)                       | 69 (15)                          | 59 (9)                           | 167 (9)                        | 41 (8)                           | 1 (0.5)                          |
| Chronic pulmonary disease                                        | 167 (12)                       | 67 (15)                          | 40 (6)                           | 126 (7)                        | 26 (5)                           | 2 (1)                            |
| Diabetes                                                         | 81 (6)                         | 30 (7)                           | 25 (4)                           | 80 (4)                         | 19 (4)                           | 0 (0)                            |
| Obesity                                                          | 218 (16)                       | 89 (20)                          | 63 (10)                          | 300 (16)                       | 66 (12)                          | 22 (12)                          |
| <b>COVID-19 infections prior to first vaccination – no. (%)</b>  |                                |                                  |                                  |                                |                                  |                                  |
| Total confirmed COVID-19 diagnoses*                              | 128 (9)                        | 44 (10)                          | 65 (10)                          | 274 (15)                       | 82 (15)                          | 65 (34)                          |
| PCR-confirmed diagnosis only                                     | 0 (0)                          | 0 (0)                            | 0 (0)                            | 79 (4)                         | 22 (4)                           | 4 (2)                            |
| Serological confirmed diagnosis only                             | 58 (4)                         | 20 (4)                           | 37 (6)                           | 113 (6)                        | 31 (6)                           | 21 (11)                          |
| PCR and serological confirmed diagnosis                          | 70 (5)                         | 24 (5)                           | 28 (4)                           | 82 (4)                         | 29 (6)                           | 40 (21)                          |
| <b>Immune mediated inflammatory disorders – no. (%)</b>          |                                |                                  |                                  |                                |                                  |                                  |
| Rheumatic disease <sup>a</sup>                                   | 1355 (100)                     | 454 (100)                        | -                                | 634 (34)                       | 88 (17)                          | -                                |
| Neurological <sup>b</sup>                                        | 0 (0)                          | 0 (0)                            | -                                | 492 (27)                       | 183 (34)                         | -                                |
| Gastro-enterological <sup>c</sup>                                | 0 (0)                          | 0 (0)                            | -                                | 484 (26)                       | 121 (23)                         | -                                |
| Dermatological <sup>d</sup>                                      | 0 (0)                          | 0 (0)                            | -                                | 242 (13)                       | 139 (26)                         | -                                |
| <b>Immunosuppressants – no. (%)<sup>#</sup></b>                  |                                |                                  |                                  |                                |                                  |                                  |
| MTX                                                              | 671 (50)                       | -                                | -                                | 321 (17)                       | -                                | -                                |
| monotherapy                                                      | 288 (21)                       |                                  |                                  | 154 (8)                        |                                  |                                  |
| TNF-inhibitor                                                    | 482 (36)                       | -                                | -                                | 447 (24)                       | -                                | -                                |
| monotherapy                                                      | 240 (18)                       |                                  |                                  | 283 (15)                       |                                  |                                  |
| Anti-CD20                                                        | 54 (4)                         | -                                | -                                | 212 (11)                       | -                                | -                                |
| monotherapy                                                      | 15 (1)                         |                                  |                                  | 155 (8)                        |                                  |                                  |
| MMF                                                              | 9 (0.7)                        | -                                | -                                | 96 (5)                         | -                                | -                                |
| monotherapy                                                      | 3 (0.2)                        |                                  |                                  | 66 (4)                         |                                  |                                  |
| S1P modulator                                                    | 0 (0)                          | -                                | -                                | 66 (4)                         | -                                | -                                |
| monotherapy                                                      | 0 (0)                          |                                  |                                  | 66 (4)                         |                                  |                                  |
| Other immunosuppressants <sup>e</sup>                            | 653 (48)                       | -                                | -                                | 1066 (58)                      | -                                | -                                |
| monotherapy                                                      | 252 (19)                       |                                  |                                  | 705 (38)                       |                                  |                                  |
| <b>SARS-CoV-2 vaccination types – no. (%)</b>                    |                                |                                  |                                  |                                |                                  |                                  |
| AstraZeneca                                                      | 265 (20)                       | 72 (16)                          | 170 (27)                         | 204 (11)                       | 60 (11)                          | 2 (1)                            |
| Pfizer/BioNTech                                                  | 924 (68)                       | 332 (73)                         | 376 (60)                         | 1095 (59)                      | 266 (50)                         | 70 (37)                          |
| Moderna                                                          | 92 (7)                         | 34 (8)                           | 43 (7)                           | 471 (25)                       | 169 (32)                         | 104 (55)                         |
| Janssen                                                          | 27 (2)                         | 4 (0.9)                          | 29 (5)                           | 38 (2)                         | 22 (4)                           | 11 (6)                           |
| Mix                                                              | 47 (4)                         | 12 (3)                           | 14 (2)                           | 44 (2)                         | 14 (3)                           | 3 (2)                            |
| Time since full vaccination, days – mean (SD)                    | 189 (41)                       | 187 (42)                         | 189 (43)                         | 164 (30)                       | 163 (32)                         | 170 (27)                         |
| Additional vaccine dose during follow-up                         | 365 (27)                       | 94 (21)                          | 130 (21)                         | 592 (32)                       | 72 (14)                          | 12 (6)                           |
| Additional vaccine dose received prior to breakthrough infection | 2 (0.1)                        | 2 (0.4)                          | 2 (0.3)                          | 14 (0.8)                       | 0 (0)                            | 0 (0)                            |

<sup>a</sup>: Including rheumatoid arthritis, spondylarthritis, systemic lupus erythematosus and Sjögren syndrome, Vasculitis (small, medium and large vessel vasculitis and other forms of vasculitis except giant cell arteriti), Other rheumatological (giant-cell arteritis, polymyalgia rheumatica and others);

<sup>b</sup>: Multiple sclerosis and neuromyelitis optica spectrum disorder, Inflammatory neuropathies and myopathies (chronic inflammatory demyelinating polyneuropathy, multifocal motor neuropathy and inflammatory myositis), Myasthenia gravis;

---

<sup>c</sup>: Gastro-enterological: Crohn's disease, ulcerative colitis, auto-immune hepatitis, other inflammatory bowel disorders (auto-immune hepatitis, auto-immune sclerosing cholangitis);

<sup>d</sup>: Dermatological: atopic dermatitis, psoriasis, pemphigus, other dermatological (vitiligo, pemphigus, psoriasis and others)

<sup>e</sup>: Other immunosuppressants include abatacept, belimumab, calcineurin inhibitors, cladribine, corticosteroids, DHODH inhibitors, dimethylfumarate, dupilumab, eculizumab, glatiramer, hydroxychloroquine, IL-17A antagonists, IL-23 antagonists, immunoglobulin, interferon- $\beta$ , JAK inhibitors, natalizumab, omalizumab, purine antagonists, tocilizumab, ustekinumab, vedolizumab, cyclophosphamide, anakinra, ixekizumab, sarilumab, sulfasalazine, leflunomide and azathioprine.

*\*In the T2B-COVID study, healthy controls with a primary COVID-19 infection were actively recruited.*

# Patients could be treated with multiple non-mutually exclusive immunosuppressants.

IMID: immune-mediated inflammatory disorder; MTX: methotrexate; TNF-inhibitor: tumor necrosis factor inhibitor; a-CD20: anti-CD20 therapy; MMF: mycophenolate mofetil; S1P: sphingosine-1-phosphate receptor modulators.

**Table S3. Baseline characteristics of all participants with and without breakthrough infections of both cohorts combined**

Table showing baseline characteristics of participants of T2B! cohort and ARC-COVID cohort combined, divided in to immune-mediated inflammatory disorder (IMiD) patients with immunosuppressants and controls (IMiD patients without immunosuppressants and healthy controls), with and without a COVID-19 breakthrough infection.

|                                                                  | IMiD patients with immunosuppressants<br>(n = 3207) |                                            | IMiD patients without immunosuppressants<br>(n = 985) |                                           | Healthy controls<br>(n = 822)         |                                           |
|------------------------------------------------------------------|-----------------------------------------------------|--------------------------------------------|-------------------------------------------------------|-------------------------------------------|---------------------------------------|-------------------------------------------|
|                                                                  | With breakthrough infection<br>(n= 148)             | Without breakthrough infection<br>(n=3059) | With breakthrough infection<br>(n=52)                 | Without breakthrough infection<br>(n=933) | With breakthrough infection<br>(n=33) | Without breakthrough infection<br>(n=789) |
| <b>SARS-CoV-2 breakthrough infection</b>                         |                                                     |                                            |                                                       |                                           |                                       |                                           |
| Cumulative incidence - %                                         | 4.6 (5)                                             | -                                          | 5.5 (5)                                               | -                                         | 4.0 (4)                               | -                                         |
| Incidence rate – no. events per 1000 person months               | 8.0                                                 | -                                          | 9.2                                                   | -                                         | 6.6                                   | -                                         |
| Time at risk, days – median (IQR)                                | 136 (115-162)                                       | 179 (161-199)                              | 138 (87-164)                                          | 175 (157-196)                             | 153 (111-173)                         | 184 (166-202)                             |
| <b>Patient characteristics</b>                                   |                                                     |                                            |                                                       |                                           |                                       |                                           |
| Age, years – mean (SD)                                           | 50 (13)                                             | 54 (14)                                    | 50 (15)                                               | 55 (14)                                   | 57 (12)                               | 57 (13)                                   |
| Female sex – no. (%)                                             | 89 (60)                                             | 1953 (64)                                  | 32 (62)                                               | 566 (61)                                  | 24 (73)                               | 525 (67)                                  |
| Male sex – no. (%)                                               | 59 (40)                                             | 1106 (36)                                  | 20 (38)                                               | 367 (39)                                  | 9 (27)                                | 264 (33)                                  |
| <b>Comorbidities – no. (%)</b>                                   |                                                     |                                            |                                                       |                                           |                                       |                                           |
| Cardiovascular disease                                           | 14 (9)                                              | 333 (11)                                   | 5 (10)                                                | 105 (11)                                  | 3 (9)                                 | 57 (7)                                    |
| Chronic pulmonary disease                                        | 12 (8)                                              | 281 (9)                                    | 5 (10)                                                | 88 (9)                                    | 4 (12)                                | 38 (5)                                    |
| Diabetes                                                         | 10 (7)                                              | 151 (5)                                    | 6 (12)                                                | 43 (5)                                    | 2 (6)                                 | 23 (3)                                    |
| Obesity                                                          | 27 (18)                                             | 491 (16)                                   | 7 (14)                                                | 148 (16)                                  | 4 (12)                                | 81 (10)                                   |
| <b>SARS-CoV-2 infections prior to first vaccination– no. (%)</b> |                                                     |                                            |                                                       |                                           |                                       |                                           |
| Total confirmed diagnoses                                        | 10 (7)                                              | 392 (13)                                   | 3 (6)                                                 | 123 (13)                                  | 2 (6)                                 | 128 (16)                                  |
| PCR confirmed diagnosis                                          | 4 (3)                                               | 75 (2)                                     | 0 (0)                                                 | 48 (5)                                    | 0 (0)                                 | 4 (1)                                     |
| Serological confirmed diagnosis                                  | 6 (4)                                               | 165 (5)                                    | 3 (6)                                                 | 22 (2)                                    | 2 (6)                                 | 56 (7)                                    |
| PCR and serological confirmed                                    | 0 (0)                                               | 152 (5)                                    | 0 (0)                                                 | 53 (6)                                    | 0 (0)                                 | 68 (9)                                    |
| <b>Immune-mediated inflammatory disorders – no. (%)</b>          |                                                     |                                            |                                                       |                                           |                                       |                                           |
| Rheumatic disease <sup>a</sup>                                   | 84 (57)                                             | 1902 (62)                                  | 31 (60)                                               | 511 (55)                                  | -                                     | -                                         |
| Neurological <sup>b</sup>                                        | 22 (15)                                             | 470 (15)                                   | 5 (10)                                                | 178 (19)                                  | -                                     | -                                         |
| Gastro-enterological <sup>c</sup>                                | 32 (21)                                             | 452 (15)                                   | 5 (10)                                                | 116 (12)                                  | -                                     | -                                         |
| Dermatological <sup>d</sup>                                      | 10 (7)                                              | 232 (8)                                    | 11 (21)                                               | 128 (14)                                  | -                                     | -                                         |
| <b>Immunosuppressants– no. (%)*</b>                              |                                                     |                                            |                                                       |                                           |                                       |                                           |
| MTX                                                              | 37 (25)                                             | 955 (31)                                   | -                                                     | -                                         | -                                     | -                                         |
| monotherapy                                                      | 15 (10)                                             | 427 (14)                                   | -                                                     | -                                         | -                                     | -                                         |
| TNF-inhibitor                                                    | 49 (33)                                             | 880 (29)                                   | -                                                     | -                                         | -                                     | -                                         |
| monotherapy                                                      | 30 (20)                                             | 493 (16)                                   | -                                                     | -                                         | -                                     | -                                         |
| Anti-CD20                                                        | 16 (11)                                             | 250 (8)                                    | -                                                     | -                                         | -                                     | -                                         |
| monotherapy                                                      | 12 (8)                                              | 158 (5)                                    | -                                                     | -                                         | -                                     | -                                         |
| MMF                                                              | 3 (2)                                               | 102 (3)                                    | -                                                     | -                                         | -                                     | -                                         |
| monotherapy                                                      | 0 (0)                                               | 35 (1)                                     | -                                                     | -                                         | -                                     | -                                         |
| S1P modulator                                                    | 5 (3)                                               | 61 (2)                                     | -                                                     | -                                         | -                                     | -                                         |
| monotherapy                                                      | 5 (3)                                               | 61 (2)                                     | -                                                     | -                                         | -                                     | -                                         |
| Other immunosuppressants <sup>e</sup>                            | 73 (49)                                             | 1646 (54)                                  | -                                                     | -                                         | -                                     | -                                         |
| monotherapy                                                      | 42 (28)                                             | 915 (30)                                   | -                                                     | -                                         | -                                     | -                                         |
| <b>SARS-CoV-2 vaccine types – no. (%)</b>                        |                                                     |                                            |                                                       |                                           |                                       |                                           |
| AstraZeneca                                                      | 19 (13)                                             | 450 (15)                                   | 6 (12)                                                | 126 (14)                                  | 11 (33)                               | 161 (20)                                  |
| Pfizer/BioNTech                                                  | 99 (66)                                             | 1920 (63)                                  | 34 (65)                                               | 564 (61)                                  | 18 (55)                               | 428 (54)                                  |
| Moderna                                                          | 27 (18)                                             | 536 (18)                                   | 10 (19)                                               | 193 (21)                                  | 4 (12)                                | 143 (18)                                  |



|                                                   |                 |                |             |                |                |               |
|---------------------------------------------------|-----------------|----------------|-------------|----------------|----------------|---------------|
| Janssen                                           | 1 (0.7)         | 64 (2)         | 2 (4)       | 24 (3)         | 0 (0)          | 40 (5)        |
| Mix                                               | 3 (2)           | 88 (3)         | 0 (0)       | 26 (3)         | 0 (0)          | 17 (2)        |
| Additional vaccine dose during follow-up          | 23 (15)         | 934 (31)       | 2 (4)       | 164 (18)       | 3 (9)          | 139 (18)      |
| Additional vaccine received prior to breakthrough | 16 (11)         | -              | 1 (2)       | -              | 1 (3)          | -             |
| <b>Post-vaccination antibody response</b>         | n = 84          | n = 1572       | n = 22      | n = 452        | n = 7          | n = 167       |
| Seroconversion – no. (%)                          | 66 (79)         | 1361 (87)      | 22 (100)    | 439 (97)       | 7 (100)        | 165 (99)      |
| Median IgG titer (IQR), all groups                | 61 (13 - 131)   | 86 (19 - 201)  | 90 (42-219) | 157 (65 - 283) | 135 (86 - 223) | 233 (143-367) |
| Poor responders <sup>f</sup>                      | 0.1 (0.1 – 2.3) | 3.8 (0.1 – 25) | -           | -              | -              | -             |
| Other immunosuppressants                          | 88 (50 – 146)   | 111 (46 – 227) | -           | -              | -              | -             |

<sup>a</sup>: Including rheumatoid arthritis, spondylarthritis, systemic lupus erythematosus and Sjogren's syndrome, Vasculitis (small, medium and large vessel vasculitis and other forms of vasculitis except giant cell arteritis), Other rheumatological (giant-cell arteritis, polymyalgia rheumatica and others);

<sup>b</sup>: Multiple sclerosis and neuromyelitis optica spectrum disorder, Inflammatory neuropathies and myopathies (chronic inflammatory demyelinating polyneuropathy, multifocal motor neuropathy and inflammatory myositis), Myasthenia gravis;

<sup>c</sup>: Gastro-enterological: Crohn's disease, ulcerative colitis, auto-immune hepatitis, other inflammatory bowel disorders (auto-immune hepatitis, auto-immune sclerosing cholangitis);

<sup>d</sup>: Dermatological: atopic dermatitis, psoriasis, pemphigus, other dermatological (vitiligo, pemphigus, psoriasis and others)

<sup>e</sup>: Other immunosuppressants include abatacept, belimumab, calcineurin inhibitors, cladribine, corticosteroids, DHODH inhibitors, dimethylfumarate, dupilumab, eculizumab, glatiramer, hydroxychloroquine, IL-17A antagonists, IL-23 antagonists, immunoglobulin, interferon-β, JAK inhibitors, natalizumab, omalizumab, purine antagonists, tocilizumab, ustekinumab, vedolizumab, cyclophosphamide, anakinra, ixekizumab, sarilumab, sulfasalazine, leflunomide and azathioprine.

<sup>f</sup>: anti-CD20 therapy, sphingosine-1-phosphate receptor (S1P) modulators, and mycophenolate mofetil (MMF)

**Table S4. Sensitivity analyses**

Table showing results for univariable and multivariable sensitivity analyses for potential clinical and humoral determinants. A) Includes IMID patients with and without seroconversion, healthy controls are excluded. B) Includes IMID patients with immunosuppressants and healthy controls, IMID patients without immunosuppressants are excluded. C) Includes IMID patients without immunosuppressants and healthy controls, IMID patients with immunosuppressants are excluded. D) Includes all participants. E) Includes participants without a history of a SARS-CoV-2 infection prior to vaccination (primary COVID-19), participants with primary COVID-19 are excluded. F) Includes participants without primary COVID-19 from the T2B-study only, all participants from the ARC study and participants from the T2B study with primary COVID-19 are excluded.

| <b>A) IMID patients with immunosuppressants compared to IMID patients without immunosuppressants only</b> |                                           |           |               |                |
|-----------------------------------------------------------------------------------------------------------|-------------------------------------------|-----------|---------------|----------------|
| <b>Univariable model</b> ( <i>N:4192, no. events: 201</i> )                                               |                                           | <b>OR</b> | <b>95% CI</b> | <b>p-value</b> |
|                                                                                                           | IMID patients without immunosuppressants* | 1.00      | -             |                |
|                                                                                                           | IMID patients with immunosuppressants     | 0.87      | (0.63 – 1.21) | 0.42           |
| <b>Multivariable model</b> ( <i>N:4180, no. events: 199</i> ) #                                           |                                           |           |               |                |
|                                                                                                           | IMID patients without immunosuppressants* | 1.00      | -             |                |
|                                                                                                           | IMID patients with immunosuppressants     | 0.85      | (0.61 – 1.18) | 0.34           |
| <b>B) IMID patients with immunosuppressants compared healthy controls only</b>                            |                                           |           |               |                |
| <b>Univariable model</b> ( <i>N:4029, no. events: 183</i> )                                               |                                           |           |               |                |
|                                                                                                           | Healthy controls*                         | 1.00      | -             |                |
|                                                                                                           | IMID patients with immunosuppressants     | 1.13      | (0.77 – 1.66) | 0.53           |
| <b>Multivariable model</b> ( <i>N:39270, no. events: 177</i> ) #                                          |                                           |           |               |                |
|                                                                                                           | Healthy controls*                         | 1.00      | -             |                |
|                                                                                                           | IMID patients with immunosuppressants     | 0.99      | (0.65 – 1.50) | 0.95           |
| <b>C) IMID patients without immunosuppressants compared to healthy controls</b>                           |                                           |           |               |                |
| <b>Univariable model</b> ( <i>N:1807, no. events: 86</i> )                                                |                                           |           |               |                |
|                                                                                                           | Healthy controls*                         | 1.00      | -             |                |
|                                                                                                           | IMID patients without immunosuppressants  | 1.29      | (0.83 – 2.01) | 0.26           |
| <b>Multivariable model</b> ( <i>N:1705, no. events: 80</i> )                                              |                                           |           |               |                |
|                                                                                                           | Healthy controls*                         | 1.00      | -             |                |
|                                                                                                           | IMID patients without immunosuppressants  | 1.21      | (0.75 – 1.97) | 0.44           |
| <b>D) Clinical determinant analyses adjusted for time since vaccination <sup>a</sup></b>                  |                                           |           |               |                |
| <b>Multivariable model</b> ( <i>N:4906, no. events: 228</i> ) #                                           |                                           |           |               |                |
|                                                                                                           | Controls*                                 | 1.00      | -             |                |
|                                                                                                           | IMID patients with immunosuppressants     | 0.90      | (0.67 – 1.21) | 0.48           |

| <b>E) Clinical determinants analyses in participants without a SARS-CoV-2 infection prior to vaccination</b>              |                                           |             |                      |                   |
|---------------------------------------------------------------------------------------------------------------------------|-------------------------------------------|-------------|----------------------|-------------------|
| <b>Univariable model (N:4356, no. events: 220)</b>                                                                        |                                           | <b>OR</b>   | <b>95% CI</b>        | <b>P-value</b>    |
|                                                                                                                           | Controls*                                 | 1.00        | -                    |                   |
|                                                                                                                           | IMID patients with immunosuppressants     | 0.95        | (0.71 – 1.25)        | 0.70              |
| <b>Multivariable model (N:4264, no. events: 214) ##</b>                                                                   |                                           |             |                      |                   |
|                                                                                                                           | Controls*                                 | 1.00        | -                    |                   |
|                                                                                                                           | IMID patients with immunosuppressants     | 0.87        | (0.65 – 1.16)        | 0.34              |
| <b>Covariables; other potential risk factors</b>                                                                          |                                           |             |                      |                   |
|                                                                                                                           | Age                                       | <b>0.98</b> | <b>(0.97 – 0.99)</b> | <b>&lt;0.0001</b> |
|                                                                                                                           | Sex                                       |             |                      |                   |
|                                                                                                                           | Male sex*                                 | 1.00        | -                    |                   |
|                                                                                                                           | Female sex                                | 0.95        | (0.71 – 1.26)        | 0.71              |
|                                                                                                                           | Obesity                                   | 1.12        | (0.83 – 1.74)        | 0.34              |
|                                                                                                                           | Cardiovascular disease                    | 0.90        | (0.55 – 1.46)        | 0.67              |
|                                                                                                                           | Pulmonary disease                         | 0.95        | (0.57 – 1.57)        | 0.84              |
|                                                                                                                           | Diabetes                                  | <b>2.14</b> | <b>(1.26 – 3.64)</b> | <b>0.005</b>      |
|                                                                                                                           | Vaccine type                              |             |                      |                   |
|                                                                                                                           | AstraZeneca*                              | 1.00        | -                    |                   |
|                                                                                                                           | Pfizer/BioNTech                           | 0.93        | (0.63 – 1.39)        | 0.73              |
|                                                                                                                           | Moderna                                   | 0.86        | (0.52 – 1.40)        | 0.54              |
|                                                                                                                           | Janssen                                   | 0.42        | (0.12 – 1.41)        | 0.16              |
|                                                                                                                           | Mix                                       | 0.27        | (0.06 – 1.14)        | 0.08              |
| <b>F) Humoral determinants analyses in participants without a SARS-CoV-2 infection prior to vaccination (T2B! cohort)</b> |                                           |             |                      |                   |
| <b>Multivariable model (N:1861, no. events: 98) ###</b>                                                                   |                                           |             |                      |                   |
|                                                                                                                           | No seroconversion after full vaccination* | 1.00        | -                    |                   |
|                                                                                                                           | Seroconversion after full vaccination     | 0.59        | (0.34 – 1.00)        | 0.05              |
| <b>Multivariable model (N:1632, no. events: 80) ###</b>                                                                   |                                           |             |                      |                   |
|                                                                                                                           | 4 – 53                                    | 0.97        | (0.47 – 2.00)        | 0.93              |
|                                                                                                                           | 53 – 126                                  | 1.78        | (0.96 – 3.29)        | 0.07              |
|                                                                                                                           | 126 – 250**                               | 1.00        | -                    |                   |
|                                                                                                                           | ≥ 250                                     | 0.74        | (0.35 – 1.57)        | 0.43              |

\*: reference group

#: adjusted for age, sex, obesity, cardiovascular disease, pulmonary disease, diabetes, vaccine type, SARS-CoV-2 infection prior to vaccination and time since vaccination

##: only presented variables were included in the model.

###: adjusted for age, sex, obesity, cardiovascular disease, pulmonary disease, diabetes, vaccine type and SARS-CoV-2 infection prior to vaccination.

\*\*Third quartile was chosen as reference group based on median antibody titers observed in controls with seroconversion (181 AU/mL, IQR: 84 – 299 AU/mL).

<sup>a</sup> Analyses were requested upon review of the manuscript.

**Table S5 Characteristics of SARS-CoV-2 breakthrough cases treated with anti-CD20 therapy**

Table showing case descriptions of IMID patients with a SARS-CoV-2 breakthrough infection who were treated with anti-CD20 therapy during SARS-CoV-2 vaccination and follow-up. Table showing the number of anti-CD20 infusions received from 01-01-2020 until the SARS-CoV-2 breakthrough infection. This time frame was chosen because of the long-term effects of anti-CD20 therapy on B cells. Table also showing the number of days between last anti-CD20 infusion and the SARS-CoV-2 breakthrough infection.

| Patient | WHO COVID severity score | IMID diagnosis                   | Age | Sex    | Immunosuppressants                                         | Number of anti-CD20 infusions from 01-01-2020 until breakthrough infection | Number of days between last anti-CD20 infusion and breakthrough infection |
|---------|--------------------------|----------------------------------|-----|--------|------------------------------------------------------------|----------------------------------------------------------------------------|---------------------------------------------------------------------------|
| 1       | Symptomatic independent  | Granulomatosis with polyangiitis | 47  | Male   | Anti-CD20, corticosteroids                                 | 6                                                                          | 52                                                                        |
| 2       | Symptomatic independent  | Granulomatosis with polyangiitis | 75  | Male   | Anti-CD20                                                  | 3                                                                          | 136                                                                       |
| 3       | Symptomatic independent  | Sjogren's syndrome               | 79  | Female | Anti-CD20                                                  | 1                                                                          | 316                                                                       |
| 4       | Symptomatic independent  | Rheumatoid arthritis             | 68  | Female | Anti-CD20, methotrexate                                    | 4                                                                          | 133                                                                       |
| 5       | Symptomatic independent  | Pemphigus                        | 45  | Male   | Anti-CD20, corticosteroids                                 | 2                                                                          | 84                                                                        |
| 6       | Symptomatic independent  | Sjogren's syndrome               | 44  | Female | Anti-CD20                                                  | 4                                                                          | 91                                                                        |
| 7       | Symptomatic independent  | Systemic lupus erythematosus     | 57  | Male   | Anti-CD20, corticosteroids, cyclophosphamide, methotrexate | 4                                                                          | 107                                                                       |
| 8       | Hospitalized with oxygen | Multiple sclerosis               | 50  | Female | Anti-CD20                                                  | 3                                                                          | 37                                                                        |
| 9       | Symptomatic independent  | Multiple sclerosis               | 50  | Female | Anti-CD20                                                  | 4                                                                          | 34                                                                        |
| 10      | asymptomatic             | Multiple sclerosis               | 47  | Male   | Anti-CD20                                                  | 3                                                                          | 101                                                                       |
| 11      | Symptomatic independent  | Multiple sclerosis               | 41  | Male   | Anti-CD20                                                  | 4                                                                          | 3                                                                         |
| 12      | Symptomatic independent  | Multiple sclerosis               | 31  | Female | Anti-CD20                                                  | 2                                                                          | 145                                                                       |
| 13      | Symptomatic independent  | Multiple sclerosis               | 54  | Male   | Anti-CD20                                                  | 3                                                                          | 29                                                                        |
| 14      | Symptomatic independent  | Rheumatoid arthritis             | 60  | Female | Anti-CD20                                                  | 2                                                                          | 130                                                                       |
| 15      | Hospitalized with oxygen | Rheumatoid arthritis             | 54  | Male   | Anti-CD20                                                  | 2                                                                          | 75                                                                        |
| 16      | Deceased                 | Rheumatoid arthritis             | 76  | Male   | Anti-CD20                                                  | 1                                                                          | 60                                                                        |

IMID: immune-mediated inflammatory diseases

**Table S6 Subgroup analyses based on immunosuppressive treatment regimens**

Table showing results of univariable logistic regression analyses used to investigate associations between different types of immunosuppressants and the risk of SARS-CoV-2 breakthrough infections. These exploratory subgroup analyses were requested upon review of the manuscript.

| <b>Clinical determinant analysis</b>                   |                                                                |           |               |                |
|--------------------------------------------------------|----------------------------------------------------------------|-----------|---------------|----------------|
| <b>Univariable model</b> (N:4162, no. events: 198)     |                                                                |           |               |                |
| No. participants                                       |                                                                | <b>OR</b> | <b>95% CI</b> | <b>P value</b> |
| N: 1806                                                | Controls*                                                      | 1.00      | -             |                |
| N: 433                                                 | Anti-CD20, MMF or S1P modulators; mono- or combination therapy | 1.17      | (0.73 – 1.87) | 0.50           |
| N: 524                                                 | TNF-inhibitor, monotherapy                                     | 1.21      | (0.79 – 1.86) | 0.37           |
| N: 442                                                 | Methotrexate, monotherapy                                      | 0.75      | (0.44 – 1.29) | 0.30           |
| N: 957                                                 | Other immunosuppressants, monotherapy                          | 0.92      | (0.63 – 1.34) | 0.66           |
| <b>Multivariable model</b> (N:4075, no. events: 193) # |                                                                |           |               |                |
| N: 1719                                                | Controls*                                                      | 1.00      | -             |                |
| N: 433                                                 | Anti-CD20, MMF or S1P modulators; mono- or combination therapy | 1.05      | (0.65 – 1.68) | 0.85           |
| N: 524                                                 | TNF-inhibitor, monotherapy                                     | 1.10      | (0.71 – 1.71) | 0.67           |
| N: 442                                                 | Methotrexate, monotherapy                                      | 0.80      | (0.46 – 1.38) | 0.42           |
| N: 957                                                 | Other immunosuppressants, monotherapy                          | 0.85      | (0.58 – 1.25) | 0.41           |

\*: reference group

#: adjusted for age, diabetes and SARS-CoV-2 prior to vaccination. These variables were selected based on results of overall analyses of clinical determinants.

**Table S7. Disease severity of SARS-CoV-2 breakthrough infections**

Table showing the distribution of the disease severity of SARS-CoV-2 breakthrough infections based on WHO criteria for IMID patients with immunosuppressants, IMID patients without immunosuppressants and healthy controls, in the combined cohort and the ARC and T2B! cohort separately.

| Combined cohort                                                                                                                           | IMID patients with immunosuppressants (n= 148) | IMID patients without immunosuppressants (n=52) | Healthy controls (n=33) |
|-------------------------------------------------------------------------------------------------------------------------------------------|------------------------------------------------|-------------------------------------------------|-------------------------|
| <b>Ambulatory mild disease</b>                                                                                                            |                                                |                                                 |                         |
| Asymptomatic (1)                                                                                                                          | 27 (18)                                        | 8 (15)                                          | 9 (27)                  |
| Symptomatic; independent (2)                                                                                                              | 99 (67)                                        | 34 (65)                                         | 19 (58)                 |
| Symptomatic; assistance needed (3)                                                                                                        | 14 (9)                                         | 7 (13)                                          | 3 (9)                   |
| <b>Hospitalized: moderate disease</b>                                                                                                     |                                                |                                                 |                         |
| Hospitalized; no oxygen therapy (4)                                                                                                       | 2 (1)                                          | 1 (2)                                           | 0 (0)                   |
| Hospitalized; oxygen by mask or nasal prongs (5)                                                                                          | 4 (3)                                          | 1 (2)                                           | 1 (3)                   |
| <b>Hospitalized severe disease</b>                                                                                                        |                                                |                                                 |                         |
| Hospitalized; oxygen by NIV or high flow (6)                                                                                              | 0 (0)                                          | 0 (0)                                           |                         |
| Intubation and mechanical ventilation (7)<br><i>pO<sub>2</sub>/FiO<sub>2</sub> &gt;= 150 or SpO<sub>2</sub>/FiO<sub>2</sub> &gt;= 200</i> | 1 (1)                                          | 1 (2)                                           | 1 (3)                   |
| Mechanical ventilation (8)<br><i>pO<sub>2</sub>/FiO<sub>2</sub> &lt; 150 (SpO<sub>2</sub>/FiO<sub>2</sub> &lt; 200) or vasopressors</i>   | 0 (0)                                          | 0 (0)                                           | 0 (0)                   |
| Mechanical ventilation (9)<br><i>pO<sub>2</sub>/FiO<sub>2</sub> &lt; 150 and vasopressors, dialysis, or ECMO</i>                          | 0 (0)                                          | 0 (0)                                           | 0 (0)                   |
| <b>Dead</b>                                                                                                                               |                                                |                                                 |                         |
| Dead (10)                                                                                                                                 | 1 (1)                                          | 0 (0)                                           | 0 (0)                   |
| <b>ARC cohort</b>                                                                                                                         |                                                |                                                 |                         |
|                                                                                                                                           | <b>n = 55</b>                                  | <b>n = 27</b>                                   | <b>n = 26</b>           |
| <b>Ambulatory mild disease</b>                                                                                                            |                                                |                                                 |                         |
| Asymptomatic (1)                                                                                                                          | 20 (36)                                        | 8 (30)                                          | 9 (35)                  |
| Symptomatic; independent (2)                                                                                                              | 21 (38)                                        | 12 (44)                                         | 12 (46)                 |
| Symptomatic; assistance needed (3)                                                                                                        | 7 (38)                                         | 4 (15)                                          | 3 (12)                  |
| <b>Hospitalized: moderate disease</b>                                                                                                     |                                                |                                                 |                         |
| Hospitalized; no oxygen therapy (4)                                                                                                       | 2 (4)                                          | 1 (4)                                           |                         |
| Hospitalized; oxygen by mask or nasal prongs (5)                                                                                          | 3 (5)                                          | 1 (4)                                           | 1 (4)                   |
| <b>Hospitalized severe disease</b>                                                                                                        |                                                |                                                 |                         |
| Hospitalized; oxygen by NIV or high flow (6)                                                                                              | 0 (0)                                          | 0 (0)                                           | 0 (0)                   |
| Intubation and mechanical ventilation (7)<br><i>pO<sub>2</sub>/FiO<sub>2</sub> &gt;= 150 or SpO<sub>2</sub>/FiO<sub>2</sub> &gt;= 200</i> | 1 (2)                                          | 1 (4)                                           | 1 (4)                   |
| Mechanical ventilation (8)<br><i>pO<sub>2</sub>/FiO<sub>2</sub> &lt; 150 (SpO<sub>2</sub>/FiO<sub>2</sub> &lt; 200) or vasopressors</i>   | 0 (0)                                          | 0 (0)                                           | 0 (0)                   |
| Mechanical ventilation (9)<br><i>pO<sub>2</sub>/FiO<sub>2</sub> &lt; 150 and vasopressors, dialysis, or ECMO</i>                          | 1 (2)                                          | 0 (0)                                           | 0 (0)                   |
| <b>Dead</b>                                                                                                                               |                                                |                                                 |                         |
| Dead (10)                                                                                                                                 |                                                |                                                 |                         |
| <b>T2B! cohort</b>                                                                                                                        |                                                |                                                 |                         |
|                                                                                                                                           | <b>n = 93</b>                                  | <b>n = 25</b>                                   | <b>n = 7</b>            |
| <b>Ambulatory mild disease</b>                                                                                                            |                                                |                                                 |                         |
| Asymptomatic (1)                                                                                                                          | 7 (8)                                          | 0 (0)                                           | 0 (0)                   |
| Symptomatic; independent (2)                                                                                                              | 78 (84)                                        | 22 (88)                                         | 7 (100)                 |
| Symptomatic; assistance needed (3)                                                                                                        | 7 (8)                                          | 3 (12)                                          | 0 (0)                   |
| <b>Hospitalized: moderate disease</b>                                                                                                     |                                                |                                                 |                         |
| Hospitalized; no oxygen therapy (4)                                                                                                       | 0 (0)                                          | 0 (0)                                           | 0 (0)                   |
| Hospitalized; oxygen by mask or nasal prongs (5)                                                                                          | 1 (1)                                          | 0 (0)                                           |                         |
| <b>Hospitalized severe disease</b>                                                                                                        |                                                |                                                 |                         |
| Hospitalized; oxygen by NIV or high flow (6)                                                                                              | 0 (0)                                          | 0 (0)                                           | 0 (0)                   |
| Intubation and mechanical ventilation (7)<br><i>pO<sub>2</sub>/FiO<sub>2</sub> &gt;= 150 or SpO<sub>2</sub>/FiO<sub>2</sub> &gt;= 200</i> | 0 (0)                                          | 0 (0)                                           | 0 (0)                   |
| Mechanical ventilation (8)<br><i>pO<sub>2</sub>/FiO<sub>2</sub> &lt; 150 (SpO<sub>2</sub>/FiO<sub>2</sub> &lt; 200) or vasopressors</i>   | 0 (0)                                          | 0 (0)                                           | 0 (0)                   |
| Mechanical ventilation (9)<br><i>pO<sub>2</sub>/FiO<sub>2</sub> &lt; 150 and vasopressors, dialysis, or ECMO</i>                          | 0 (0)                                          | 0 (0)                                           | 0 (0)                   |
| <b>Dead</b>                                                                                                                               |                                                |                                                 |                         |
| Dead (10)                                                                                                                                 | 0 (0)                                          | 0 (0)                                           | 0 (0)                   |

**Table S8. Characteristics of hospitalized participants**

Table showing case descriptions of IMID patients with immunosuppressants and controls with COVID-19 breakthrough infections that were hospitalized.

| Patient | WHO COVID severity score    | IMID diagnosis      | Age | Sex    | BMI | ISP                      | Comorbidities                             | SARS-CoV-2 vaccine type |
|---------|-----------------------------|---------------------|-----|--------|-----|--------------------------|-------------------------------------------|-------------------------|
| 1       | Hospitalized without oxygen | Scleroderma         | 40  | Male   | 25  | -                        | -                                         | Pfizer/BioNTech         |
| 2       | Hospitalized without oxygen | RA                  | 59  | Male   | 32  | MTX                      | Obesity                                   | AZ                      |
| 3       | Hospitalized without oxygen | Bechterew           | 68  | Female | 25  | TNF                      | -                                         | Pfizer/BioNTech         |
| 4       | Hospitalized with oxygen    | MS                  | 50  | Female | 23  | Anti-CD20 <sup>1</sup>   | -                                         | Moderna                 |
| 5       | Hospitalized with oxygen    | RA                  | 54  | Male   | 26  | Anti-CD20 <sup>2</sup>   | Cardiovascular disease                    | Pfizer/BioNTech         |
| 6       | Hospitalized with oxygen    | RA                  | 55  | Male   | 25  | Other <sup>3</sup>       | Diabetes                                  | Pfizer/BioNTech         |
| 7       | Hospitalized with oxygen    | Healthy control     | 58  | Male   | 28  | -                        | -                                         |                         |
| 8       | Hospitalized with oxygen    | RA                  | 70  | Male   | 23  | Other <sup>4</sup>       | -                                         | Pfizer/BioNTech         |
| 9       | Hospitalized with oxygen    | RA                  | 74  | Male   | 34  | -                        | Obesity, cardiovascular disease, diabetes | Pfizer/BioNTech         |
| 10      | ICU admission               | Healthy control     | 65  | Male   | 35  | -                        | Obesity, cardiovascular disease, diabetes | AZ                      |
| 11      | ICU admission               | Bechterew, raynaud  | 57  | Female | 33  | -                        | Obesity, diabetes                         | AZ                      |
| 12      | ICU admission               | RA, vasculitis, PMR | 50  | Female | 32  | MTX + other <sup>5</sup> | Obesity, diabetes                         | Moderna                 |
| 13      | Deceased                    | RA                  | 76  | Male   | 29  | Anti-CD20 <sup>6</sup>   | -                                         | Pfizer/BioNTech         |

<sup>1</sup>: Ocrelizumab

<sup>2</sup>: Anti-CD20

<sup>3</sup>: Other immunosuppressant

<sup>4</sup>: Other immunosuppressant

<sup>5</sup>: MTX + other immunosuppressant

<sup>6</sup>: Anti-CD20 + TNF- inhibitor + other immunosuppressant

RA: rheumatoid arthritis; MS: multiple sclerosis; HC: healthy control; a-CD20: anti-CD20 therapy; MTX: methotrexate; TNF: tumor necrosis factor-inhibitors; AZ: AstraZeneca

**Table S9. Characteristics of participants who developed COVID-19 after receiving an additional vaccine dose**

Table showing case descriptions of participants with COVID-19 breakthrough infections after receiving an additional vaccine dose. In September 2021, third vaccinations were offered to specific vulnerable populations, including patients treated with anti-CD20 therapy, S1P modulators and MMF combination therapies. Distribution of SARS-CoV-2 booster vaccinations among people of Dutch population started on the 18th of November, 2021. All people, including those who received a third vaccination, were eligible to receive a booster vaccination when the last SARS-CoV-2 vaccine dose was received at least three months prior. Third and booster vaccinations were given either with BNT162b2 (Pfizer/BioNtech) or CX-024414 (Moderna) vaccines.

| Patient | WHO COVID severity score | IMID diagnosis                              | Age | Sex    | BMI | ISP                              | Comorbidities                    | SARS-CoV-2 vaccine type primary vaccinations | Seroconversion after primary vaccination |
|---------|--------------------------|---------------------------------------------|-----|--------|-----|----------------------------------|----------------------------------|----------------------------------------------|------------------------------------------|
| 1       | Symptomatic independent  | Rheumatoid arthritis                        | 58  | Female | 26  | Abatacept, methotrexate          | -                                | AstraZeneca                                  | -                                        |
| 2       | Hospitalized with oxygen | Rheumatoid arthritis                        | 54  | Male   | 26  | Anti-CD20                        | Cardiovascular disease, obesity  | Pfizer/BioNTech                              | -                                        |
| 3       | Symptomatic independent  | Vasculitis                                  | 47  | Male   | 31  | Anti-CD20, prednisone            | Diabetes                         | Pfizer/BioNTech                              | No seroconversion                        |
| 4       | Symptomatic independent  | Ulcerating colitis                          | 63  | Male   | 24  | JAK inhibitor                    | Diabetes                         | AstraZeneca                                  | No seroconversion                        |
| 5       | Asymptomatic             | Crohn's disease                             | 36  | Female | 25  | TNF inhibitor                    | -                                | Moderna                                      | Seroconversion                           |
| 6       | Symptomatic independent  | Ulcerating colitis                          | 54  | Female | 27  | TNF inhibitor, purine antagonist | Chronic pulmonary disease        | Moderna                                      | Seroconversion                           |
| 7       | Symptomatic independent  | Vasculitis                                  | 75  | Male   | 19  | Anti-CD20                        | Cardiovascular disease           | Pfizer/BioNTech                              | No seroconversion                        |
| 8       | Asymptomatic             | Myasthenia Gravis                           | 44  | Female | 32  | MMF, prednisone                  | Obesity                          | Moderna                                      | Seroconversion                           |
| 9       | Symptomatic independent  | Vasculitis                                  | 62  | Female | 25  | Prednisone, purine antagonist    | Cardiovascular disease, diabetes | AstraZeneca                                  | No seroconversion                        |
| 10      | Symptomatic independent  | Other rheumatological                       | 79  | Female | 25  | Anti-CD20                        | -                                | Pfizer/BioNTech                              | No seroconversion                        |
| 11      | Symptomatic independent  | Rheumatoid arthritis                        | 68  | Female | 29  | Anti-CD20                        | -                                | Pfizer/BioNTech                              | No seroconversion                        |
| 12      | Symptomatic independent  | Other dermatological                        | 45  | Male   | 25  | Anti-CD20, prednisone            | -                                | Pfizer/BioNTech                              | No seroconversion                        |
| 13      | Symptomatic independent  | Other rheumatological                       | 44  | Female | 24  | Anti-CD20                        | -                                | Pfizer/BioNTech                              | No seroconversion                        |
| 14      | Symptomatic independent  | Multiple sclerosis and neuromyelitis optica | 46  | Female | 25  | S1P modulator                    | -                                | Pfizer/BioNTech                              | No seroconversion                        |
| 15      | Symptomatic independent  | Multiple sclerosis and neuromyelitis optica | 50  | Male   | 22  | S1P modulator                    | -                                | Pfizer/BioNTech                              | No seroconversion                        |
| 16      | Symptomatic dependent    | Multiple sclerosis and neuromyelitis optica | 46  | Female | 22  | S1P modulator                    | -                                | Moderna                                      | No seroconversion                        |
| 17      | Symptomatic independent  | Bechterew                                   | 36  | Female | 24  | -                                | -                                | Moderna                                      | -                                        |
| 18      | Asymptomatic             | Healthy control                             | 45  | Female | 23  | -                                | -                                | AstraZeneca                                  | -                                        |

IMID: immune-mediated inflammatory disorder; MTX: methotrexate; TNF-inhibitor: tumor necrosis factor inhibitor; a-CD20: anti-CD20 therapy; MMF: mycophenolate mofetil; S1P: sphingosine-1-phosphate receptor modulators.



**Figure S1. Cumulative incidence curve**

Figure showing the of cumulative incidence curve in IMID patients with immunosuppressants and controls (A), and in participants of the T2B-study with and without seroconversion measured at 28 days after completing SARS-CoV-2 vaccination (B). Seroconversion was defined as an anti-RBD IgG response of 4.0 arbitrary units per mL (AU/mL) or higher.

**A)**

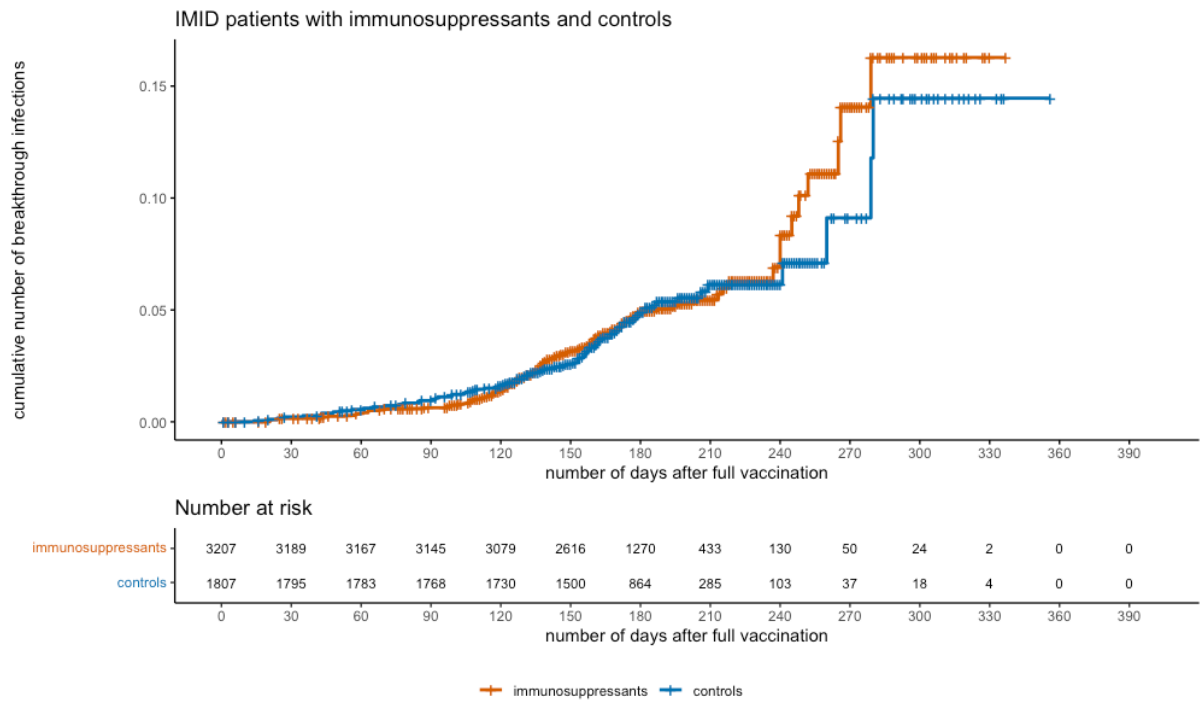

**B)**

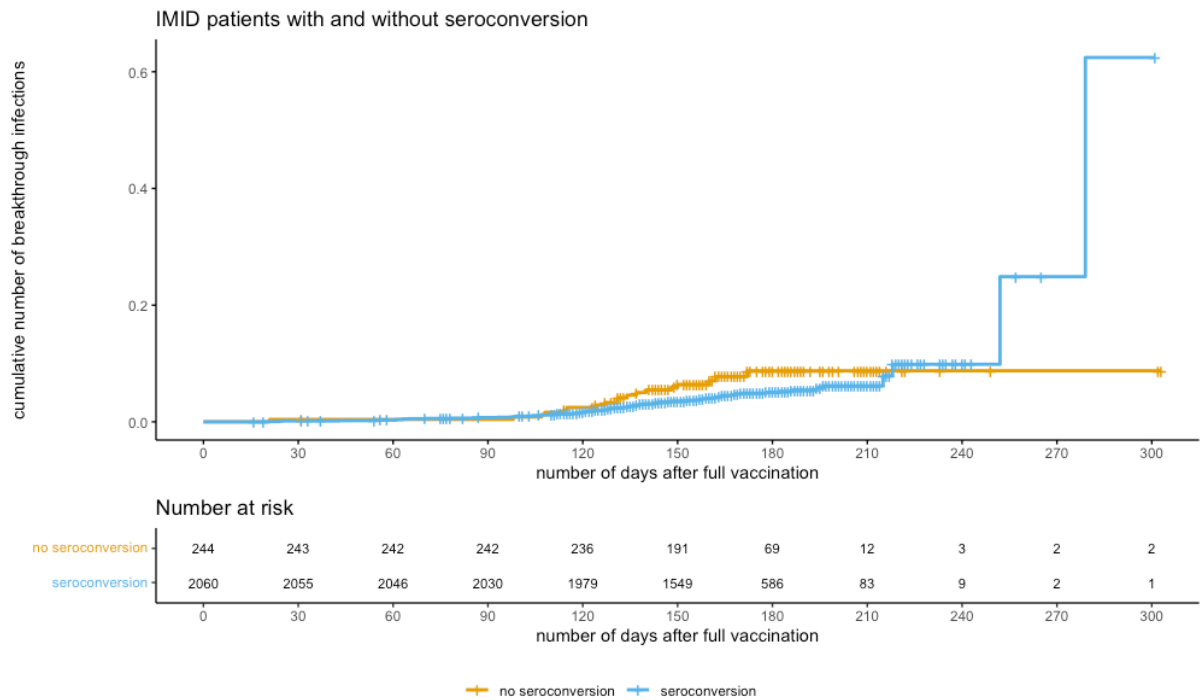

IMID: immune-mediated inflammatory disorder

**Figure S2. Flowchart of the two cohorts separately**

Figure showing the flowcharts of both studies separately, panel A shows flowchart of the T2B! study, panel B the ARC-COVID study and panel C shows flowchart of both studies combined. The total number of included participants in the ARC-study is based on the number of participants that were not (yet) lost to follow-up on March 1, 2021. This number could differ from numbers that we have reported in previous publications, as participants from the ARC study could be invited for follow-up in the T2B study between March 1 and May 31, 2021.

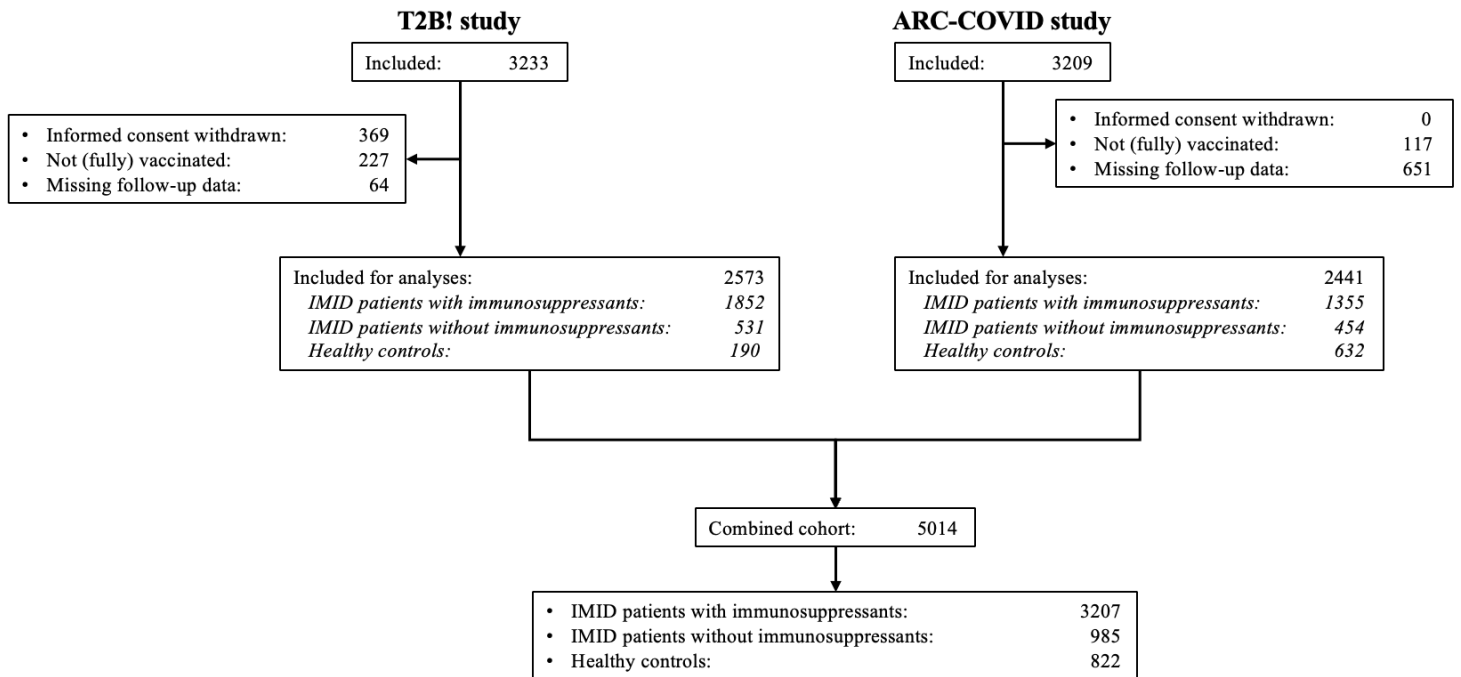

IMID: immune-mediated inflammatory disorder

**Figure S3. Relationship between antibody titers after vaccination and the incidence of SARS-CoV-2 breakthrough infections.**

Figure showing the incidence with corresponding 95% confidence interval of SARS-CoV-2 breakthrough infections in percentiles of SARS-CoV-2 IgG antibody titers after vaccination. All quartiles included 515 participants.

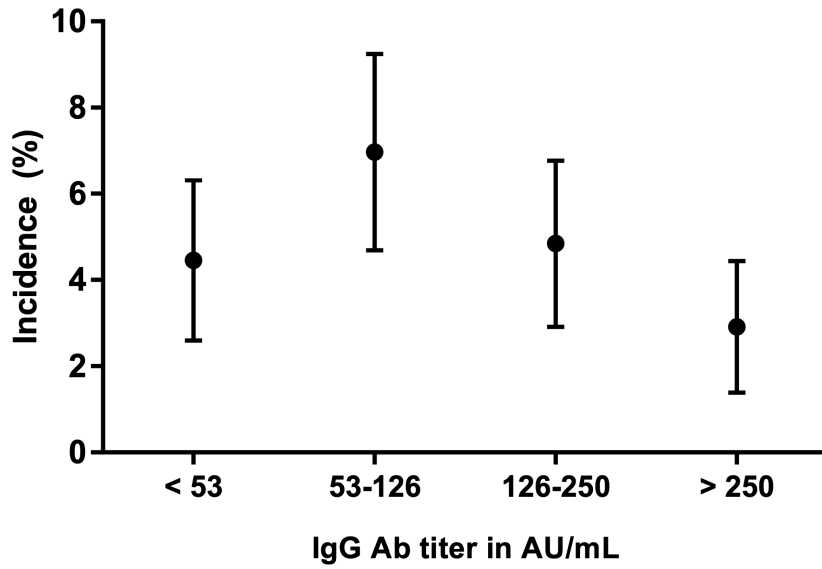

**Figure S4 Disease severity of immune-mediated inflammatory disease (IMID) patients with immunosuppressants and controls for both cohorts separately**

Figure showing disease severity of SARS-CoV-2 breakthrough infections categorized using the WHO COVID-19 Clinical Progression Scale. On the left participants from the ARC-COVID cohort were displayed, divided in IMID patients with immunosuppressants and controls (IMID patients without immunosuppressants and healthy controls). On the right side the same subdivision was made.

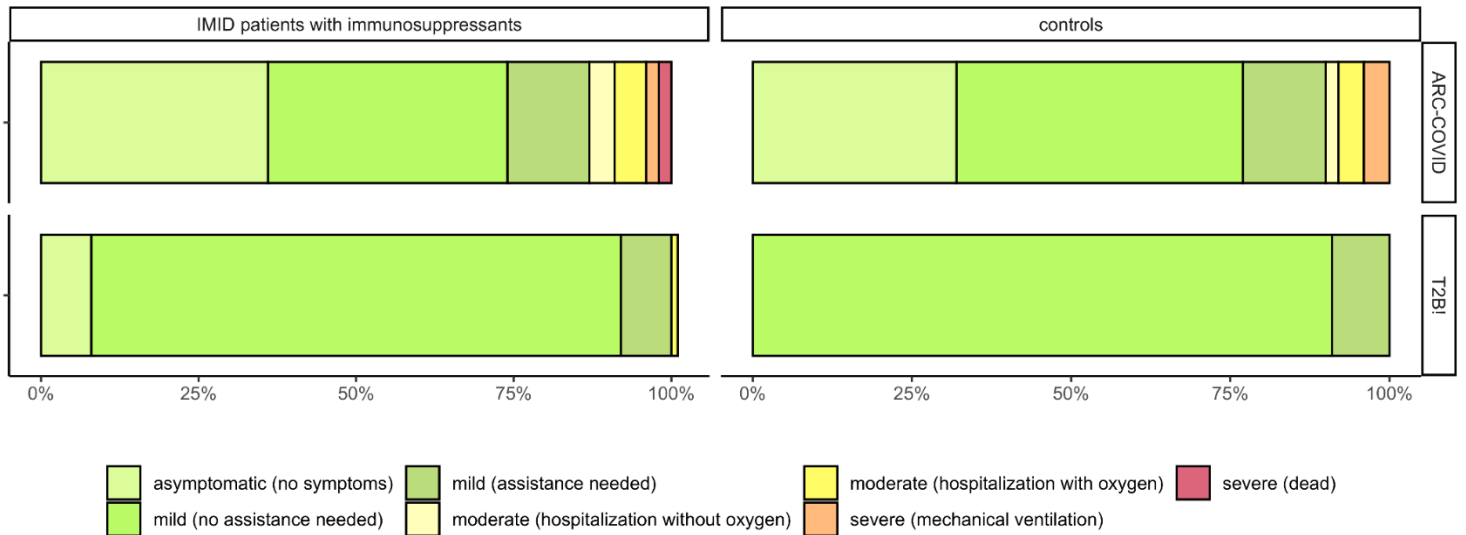

IMID: immune-mediated inflammatory disorder; ARC: ARC-COVID study; T2B: T2B! study
